# Supplementary material for: The development of a Glypican-3-specific binding peptide usingin vivoandin vitrotwo-step phage display screening for the PET imaging of hepatocellular carcinoma
Source: Royal Society of Chemistry journal article supplement (doi:10.1039/d0bm00943a), 2020-01-01
Supplement: d0bm00943a1.pdf [file d0bm00943a1.pdf]

## Supplemental information

### Development of Glypican-3-Specific Binding Peptide using *in vivo* and *in vitro* Two-step Phage Display Screening for PET Imaging of Hepatocellular Carcinoma

Yushuang Qin<sup>#, 1</sup>, Siyuan Cheng<sup>#, 1</sup>, Yesen Li<sup>2</sup>, Sijuan Zou<sup>1</sup>, Minglong Chen<sup>3</sup>, Dongling  
Zhu<sup>1</sup>, Shi Gao<sup>3</sup>, Hua Wu<sup>2</sup>, Lei Zhu<sup>\*,4</sup>, Xiaohua Zhu<sup>\*,1</sup>

1. Department of Nuclear Medicine and PET, Tongji Hospital, Tongji Medical College,  
Huazhong University of Science and Technology, Wuhan 430000, China;
2. Department of Nuclear Medicine, The First Affiliated Hospital of Xiamen  
University, Xiamen 361003, China;
3. Department of Nuclear Medicine, China-Japan Union Hospital, Jilin University,  
Changchun 130033, China;
4. Departments of Surgery, Emory University School of Medicine, Atlanta, Georgia  
30322, United States.

#### Corresponding Author

\* To whom correspondence should be addressed. E-mail: [evazhu@vip.sina.com](mailto:evazhu@vip.sina.com) (X.Z.)  
and [lei.zhu@emory.edu](mailto:lei.zhu@emory.edu) (L.Z.)

<sup>#</sup> Yushuang Qin and Siyuan Cheng contributed equally to the article.

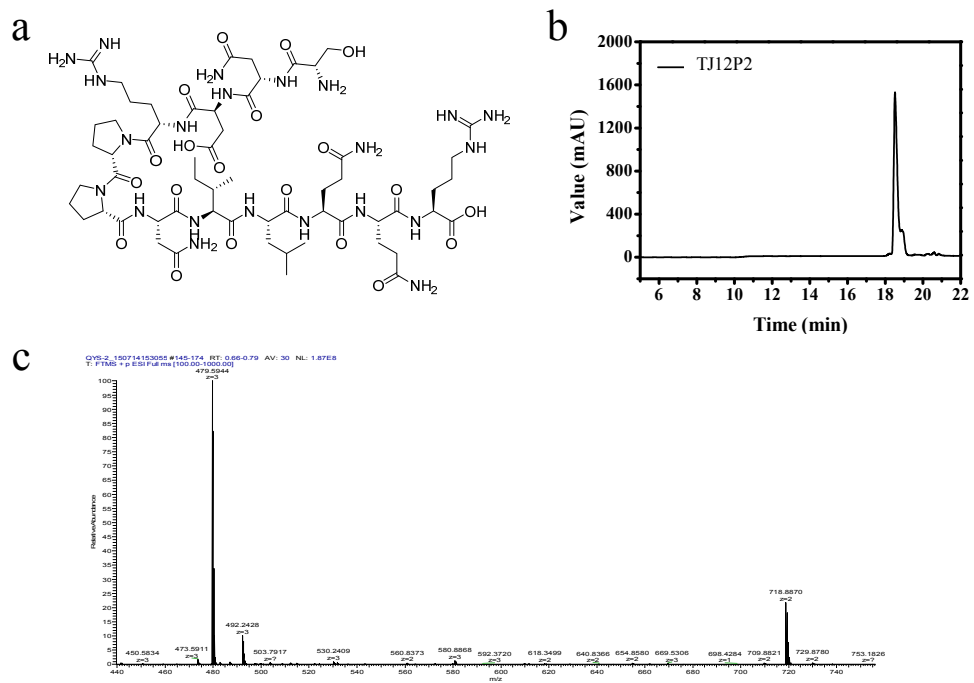

**Figure S1. Synthesis of TJ12P2. (a).** Chemical structure of TJ12P2 with the sequence of SDRPPNILQKR. **(b).** Purity of TJ12P2 by analytical HPLC. The retention time of TJ12P2 is 18.51 min. **(c).** Mass spectrum analysis of molecular weight of TJ12P2, which is 1425.76 Da.

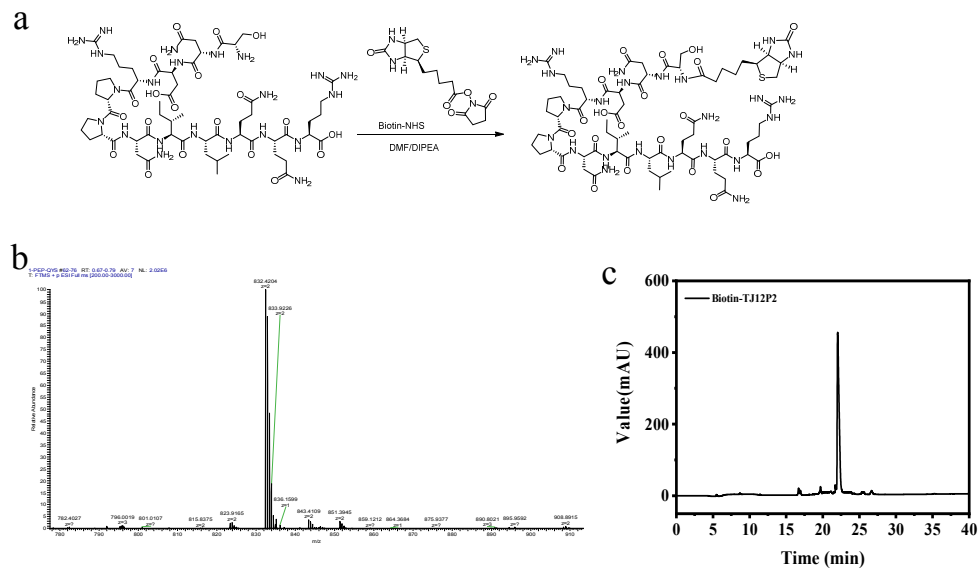

**Figure S2. Synthesis of Biotin-TJ12P2.** (a). Chemical conjugation of Biotin onto the N-terminal of TJ12P2. (b). Mass spectrum analysis of molecular weight of TJ12P2, which is 1662.8 Da. (c). Purity of Biotin-TJ12P2 by analytical HPLC. The retention time of Biotin-TJ12P2 is 22 min.

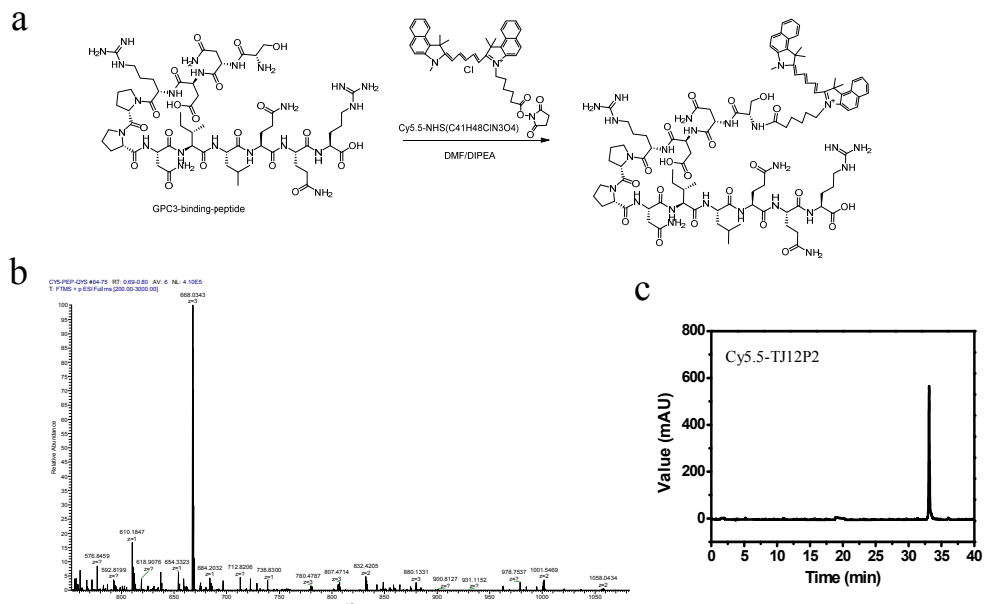

**Figure S3. Synthesis of Cy5.5-TJ12P2.** (a). Chemical conjugation of Cy5.5-NHS onto the N-terminal of TJ12P2. (b). Mass spectrum analysis of molecular weight of TJ12P2, which is 1662.8 Da. (c). Purity of Cy5.5-TJ12P2 by analytical HPLC. The retention time of Biotin-TJ12P2 is 33.12 min.

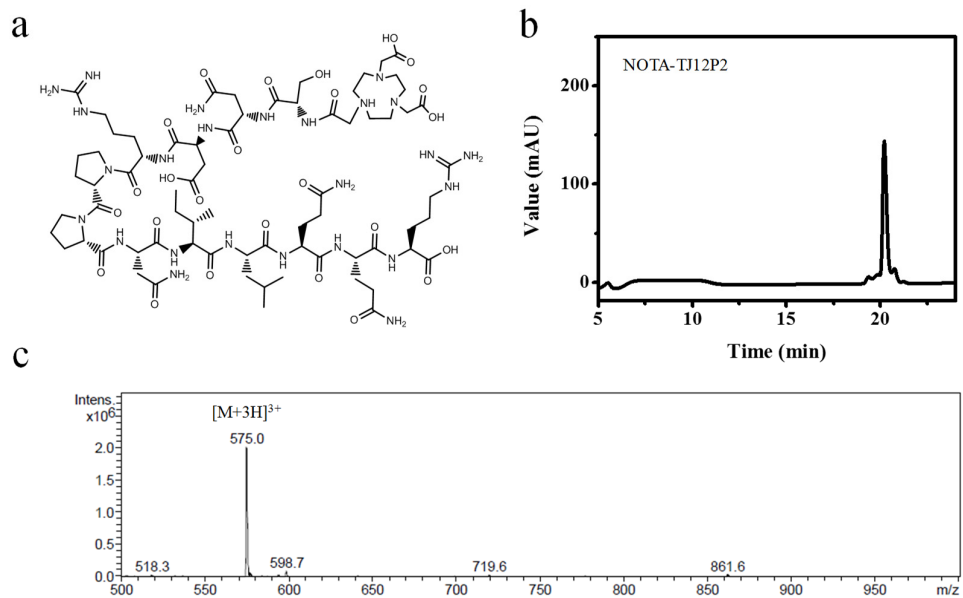

**Figure S4. Synthesis of NOTA-TJ12P2.** (a). Chemical structure of NOTA-TJ12P2. (b). Purity of NOTA-TJ12P2 by analytical HPLC. The retention time of Biotin-TJ12P2 is 20.20 min. (c). Mass spectrum analysis of molecular weight of TJ12P2, which is 1722 Da.

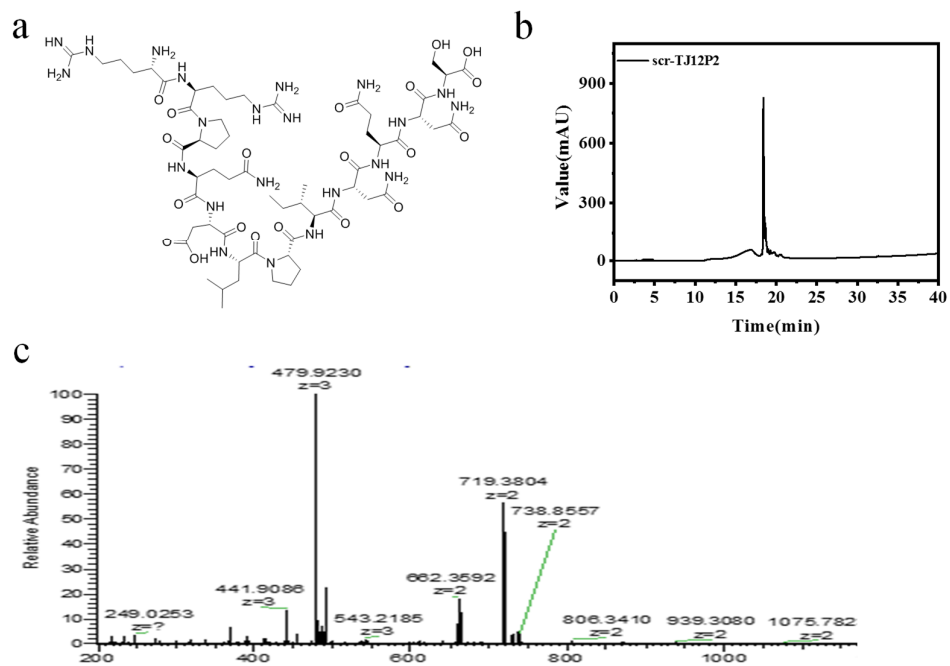

**Figure S5. Synthesis of scramble TJ12P2 peptide.** (a). Chemical structure of scramble-TJ12P2. (b). Purity of Cy5.5-TJ12P2 by analytical HPLC. The retention time of scramble-TJ12P2 is 18.40 min. (c). Mass spectrum analysis of molecular weight of scramble-TJ12P2, which is 1436.76 Da.

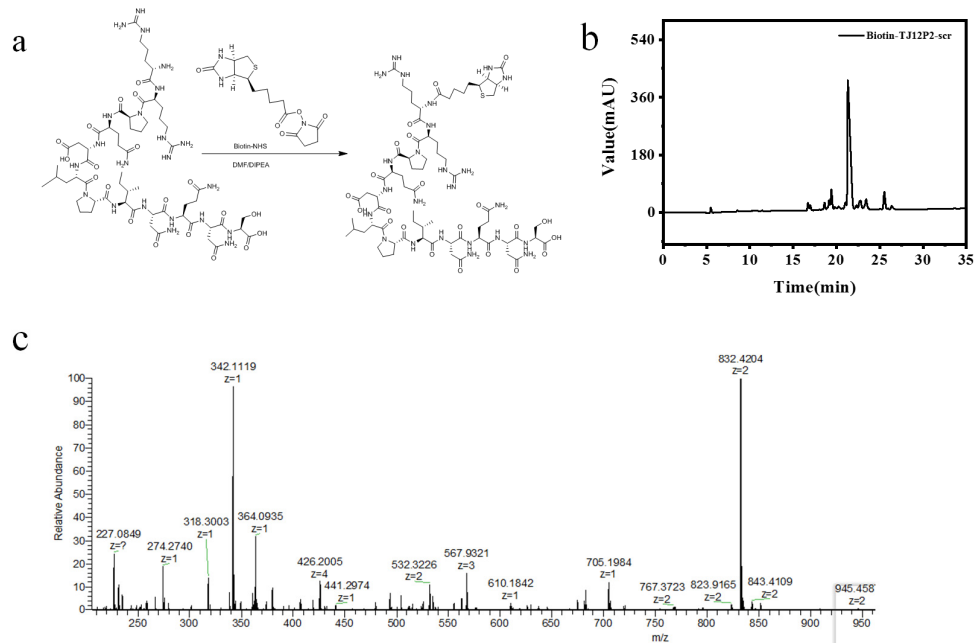

**Figure S6. Synthesis of Biotin-scrambled-TJ12P2.** (a). Chemical conjugation of Biotin onto the N-terminal of scrambled-TJ12P2. (b). Mass spectrum analysis of molecular weight of scrambled-TJ12P2, which is 1662.8 Da. (c). Purity of Biotin-scrambled-TJ12P2 by analytical HPLC. The retention time of Biotin-scrambled-TJ12P2 is 21.3 min.

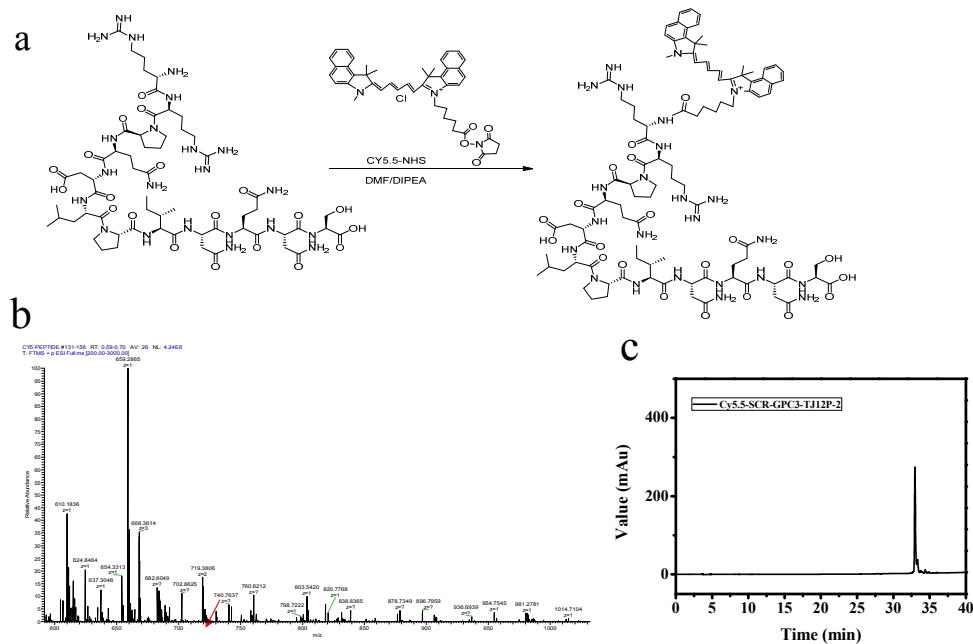

**Figure S7. Synthesis of Cy5.5-scrambled-TJ12P2.** (a). Chemical conjugation of Cy5.5-NHS onto the N-terminal of scrambled-TJ12P2. (b). Mass spectrum analysis of molecular weight of Cy5.5-scrambled-TJ12P2, which is 2002.09 Da. (c). Purity of Cy5.5-scrambled-TJ12P2 by analytical HPLC. The retention time of Biotin-TJ12P2 is 32.97 min.



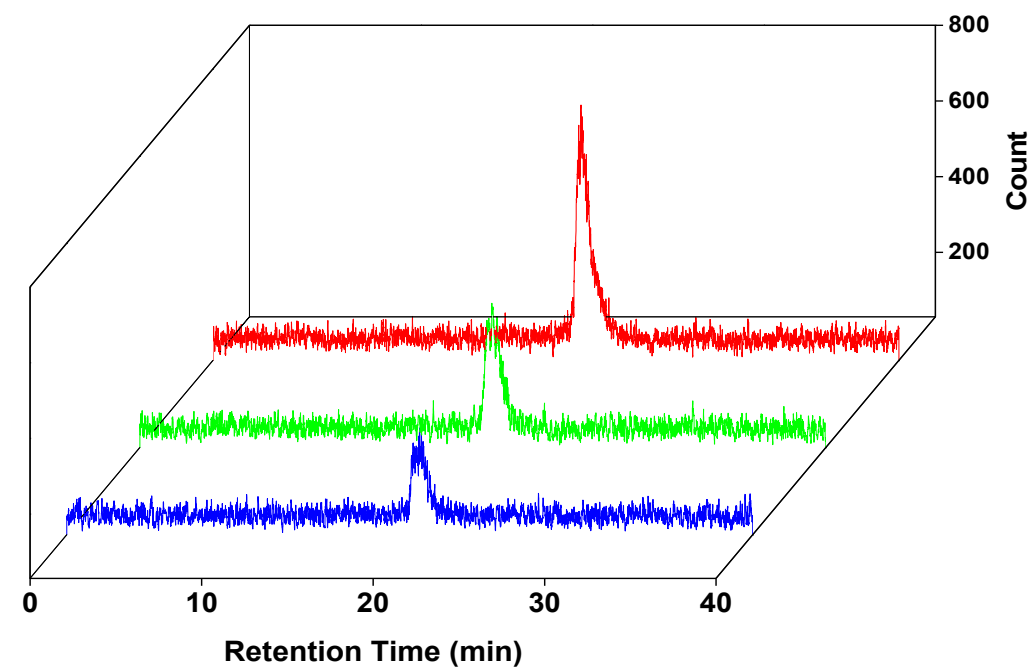

**Figure S8.** HPLC analysis of the stability of  $^{18}\text{F}$ -AIF-NOTA-TJ12P2 in physiological buffer at  $37^\circ\text{C}$  for 4 hours.

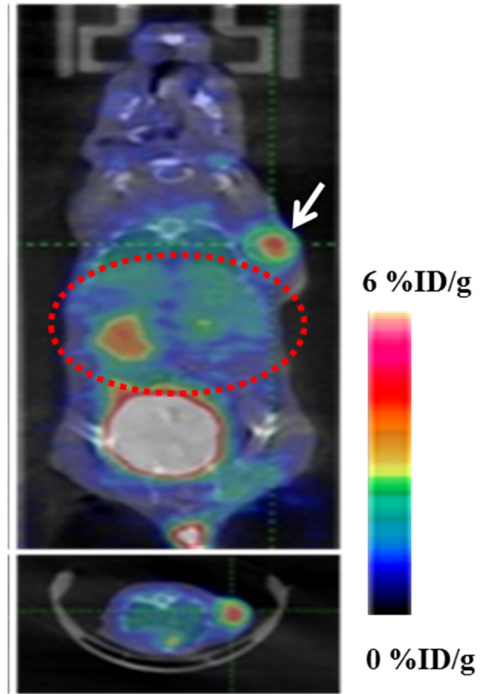

**Figure S9. Micro-PET/CT imaging of  $^{18}\text{F}$ -AIF-NOTA-TJ12P1 targetability in HepG2 tumor bearing mouse model.** White arrow points to the HepG2 tumor and red circle indicates the normal liver.
